# Supplementary material for: Mesoporous NiO nanoarchitectures for electrochemical energy storage: influence of size, porosity, and morphology
Source: Royal Society of Chemistry journal article supplement (doi:10.1039/c3ra44465a), 2013-01-01
Supplement: c3ra44465a.pdf [file c3ra44465a.pdf]

## Electronic Supplementary Information (ESI)

### **Mesoporous NiO nanoarchitectures for electrochemical energy storages: influence of size, porosity, and morphology**

*Mohamed Khairy and Sherif A. El-Safty*

National Institute for Materials Science (NIMS), 1-2-1 Sengen, Tsukuba-shi, Ibaraki-ken 305-0047, Japan.

Graduate School for Advanced Science and Engineering, Waseda University, 3-4-1 Okubo, Shinjuku-ku, Tokyo 169-8555, Japan.

Tel: [+81-298592135](tel:+81-298592135);

Fax: [+81-298592025](tel:+81-298592025).

E-mail: [sherif.elsafty@nims.go.jp](mailto:sherif.elsafty@nims.go.jp); [sherif@aoni.waseda.jp](mailto:sherif@aoni.waseda.jp)

Supplementary S1:

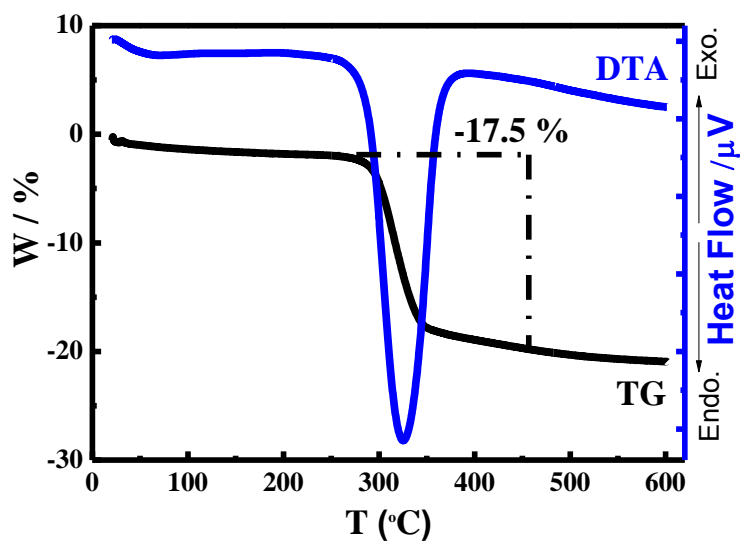

Figure S1. TG-DTA of NiO Nanoplatelets fabricated by microwave assisted method.

Supplementary S2:

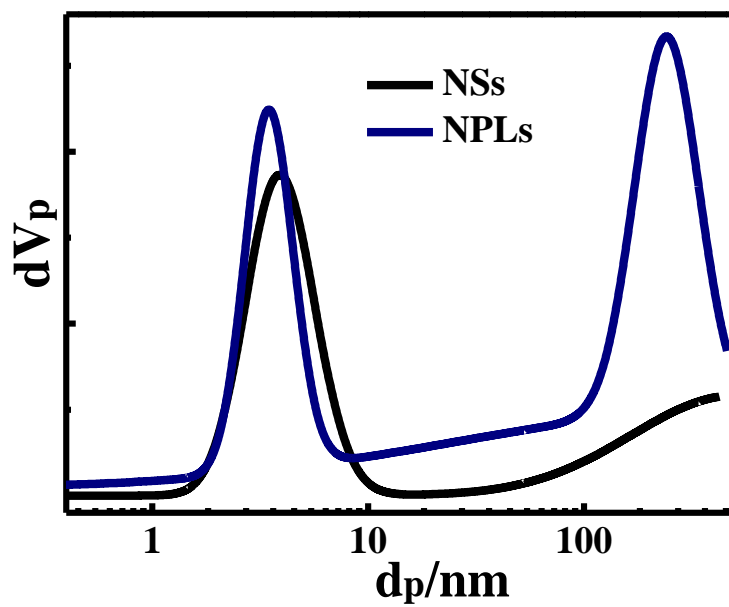

**Figure S2.** The pore distribution calculated by the NLDFT model of mesoporous NiO samples.

**Supplementary S3:**

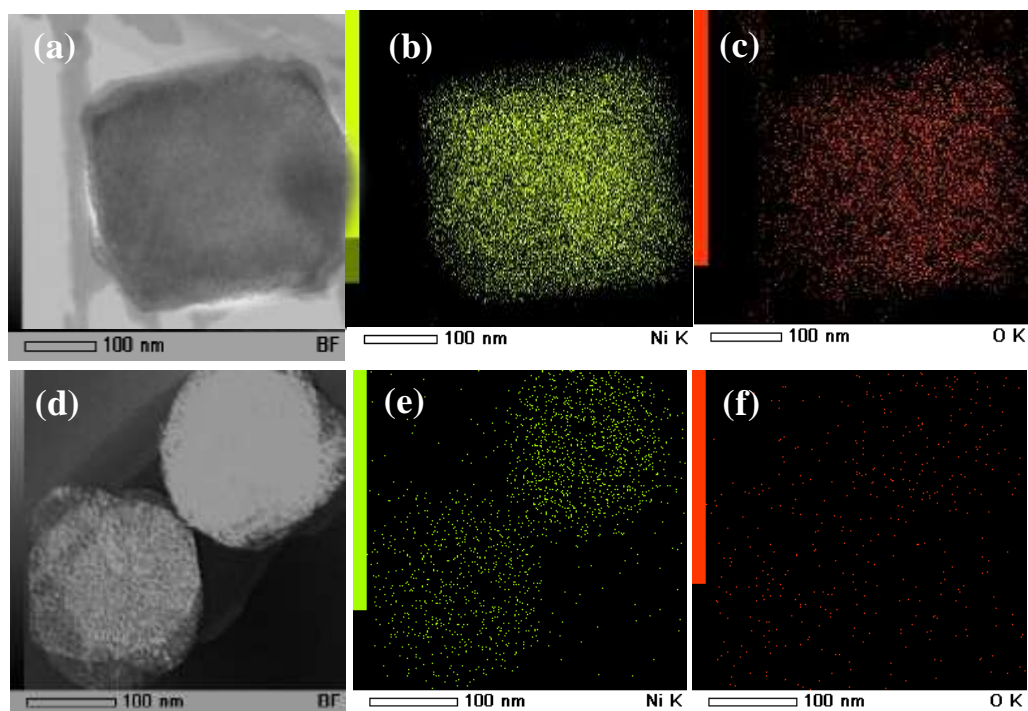

**Figure S3.** STEM-EDS mapping of mesoporous NiO nanostructured, (a, and d) STEM images, (b, and e) Nickel atoms, and (c, and f) oxygen atoms of NiO nanoslices, and NiO nanoplatelets, respectively.

Supplementary S4:

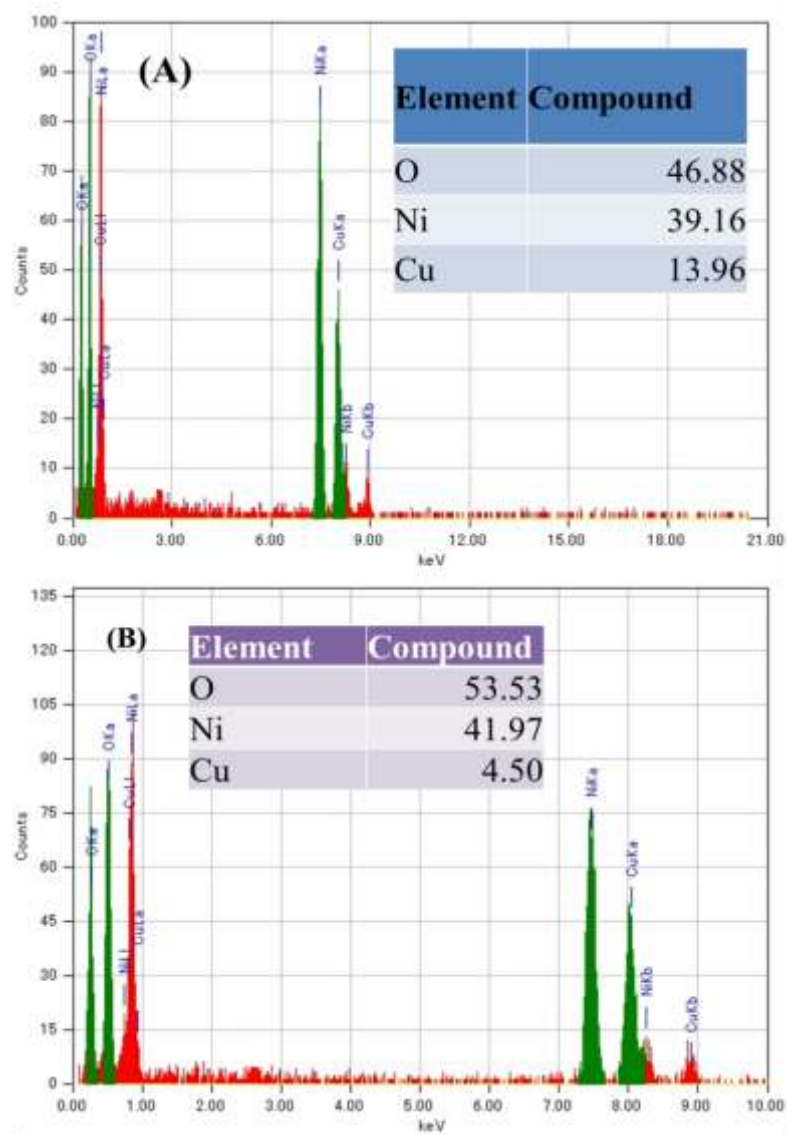

Figure S4. EDS analysis of NiO nanoparticles (A) nanoslices and (B) nanoplatelets.

Supplementary S5:

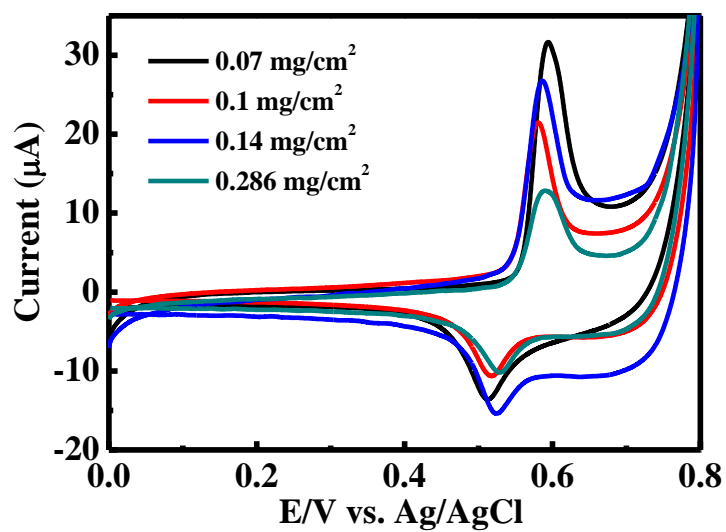

**Figure S5.** Cyclic voltammetric measurements of different mass loading of active NiO NPLs at scan rate 10 mV/s.

Supplementary S6:

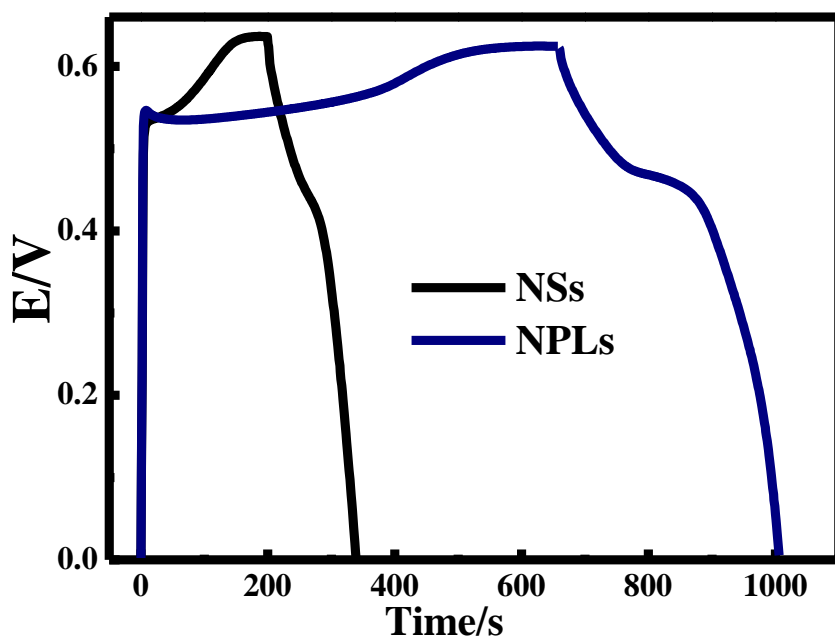

**Figure S6.** Galvanostatic charge/discharge curves of NiO nanoparticles at discharge current 2A/g.

Supplementary S7:

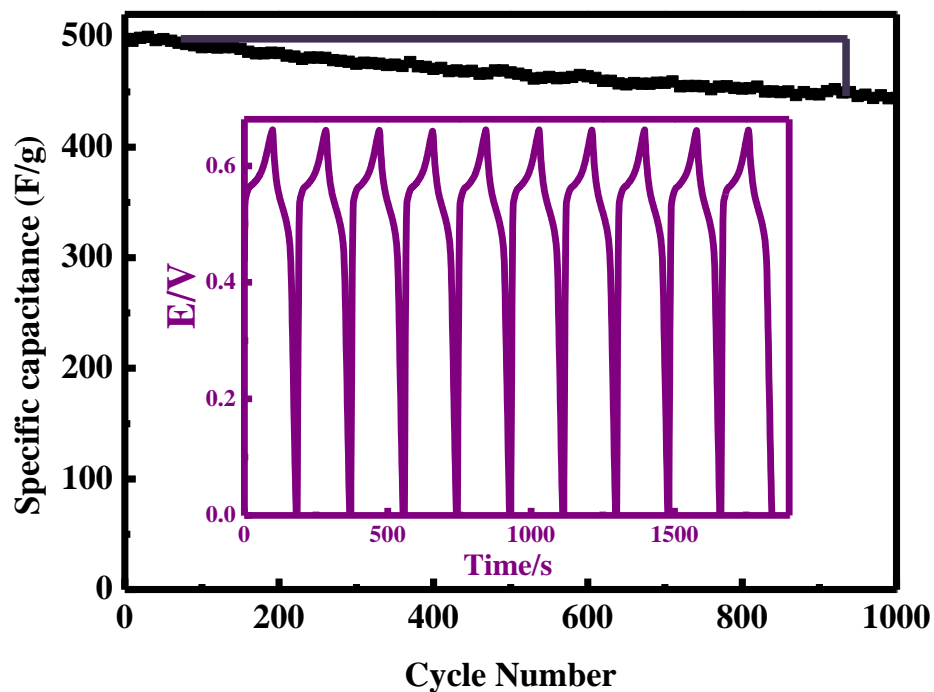

**Figure S7.** Cycling performance of mesoporous NiO nanostructured in 2 M NaOH at  $2 \text{ Ag}^{-1}$  prepared through hydrothermal method.<sup>34</sup>



**Supplementary S8:**

**Table S8**

Comparison of the capacity of the our mesoporous NiO NPs and other materials in literatures

| <b>Material</b>                      | <b>Specific capacitance</b>                  | <b>Energy density</b> | <b>Power density</b> | <b>Mass loading</b>     | <b>Reference</b> |
|--------------------------------------|----------------------------------------------|-----------------------|----------------------|-------------------------|------------------|
| <b>NiO nanoplatelets</b>             | 1361 Fg <sup>-1</sup> at 1 mVs <sup>-1</sup> | 63.8 Wh/kg            | 13.2 kW/kg           | 0.14 mg/cm <sup>2</sup> | In this work     |
| <b>NiO Nanoslices</b>                | 685 at 1 mVs                                 | 29.04 Wh/kg           | 4.74 kW/kg           | 0.14 mg/cm <sup>2</sup> | In this work     |
| <b>NiO nanocolumns</b>               | 390 F/g at 5A/g<br>686 F/g at 1A/g           | ---                   | ---                  |                         | (25)             |
| <b>NiO nanoslices</b>                | 176 F/g at 5A/g                              | ---                   | ---                  |                         | (25)             |
| <b>NiO nanoplates</b>                | 285 F/g at 5A/g                              | ---                   | ---                  |                         | (25)             |
| <b>NiO platelets</b>                 | 286.7 F/g at 1A/g                            | ---                   | ---                  |                         | (34)             |
| <b>NiO flower</b>                    | 381 F/g at 1A/g                              | ---                   | ---                  |                         | (21b)            |
| <b>NiO slices</b>                    | 86 F/g at 1A/g                               | ---                   | ---                  |                         | (21b)            |
| <b>NiO nanoparticles</b>             | 235 F/g at 1A/g                              | ---                   | ---                  |                         | (21b)            |
| <b>C@NiO</b>                         | 988.7 F/g at 0.5 A/g                         | ---                   | ---                  |                         | (36)             |
| <b>Ni(OH)<sub>2</sub></b>            | 755 F/g at 1A/g                              |                       |                      | 4 mg/cm <sup>2</sup>    | (20)             |
| <b>NiO/Ni Nanocomposites</b>         | 905 F/g at 1A/g                              | 60 Wh/kg              | 10 kW/kg             | 40 mg/cm <sup>2</sup>   | (28)             |
| <b>NiO Flower</b>                    | 370 F/g at 2A/g                              | 50 Wh/kg              | 4.4 kW/kg            | ---                     | (21a)            |
| <b>Au/MnO<sub>2</sub></b>            | 1,145 F/g at 50mV/s                          | ---                   | ---                  | 4 mg/cm <sup>2</sup>    | (2)              |
| <b>Au/MnO<sub>2</sub> Core/Shell</b> | 1020 F/g at 5 mV/s                           | ---                   | ---                  | 0.1 mg/cm <sup>2</sup>  | (37b)            |
